# Supplementary material for: A 4D printed nanoengineered super bioactive hydrogel scaffold with programmable deformation for potential bifurcated vascular channel construction
Source: Royal Society of Chemistry journal article supplement (doi:10.1039/d4tb00498a), 2024-01-01
Supplement: d4tb00498a1.pdf [file d4tb00498a1.pdf]

## *Supplementary Information*

### **4D printed nanoengineered super bioactive hydrogel scaffold with programmable deformation for potential bifurcated vascular channel construction**

*Amit Nain,<sup>a,\*</sup> Akshat Joshi,<sup>b</sup> Souvik Debnath,<sup>a</sup> Saswat Chodhury,<sup>c</sup> Jobin Thomas,<sup>d</sup> Jitendra Satija,<sup>d</sup> Chih-Ching Huang,<sup>e,f</sup> Kaushik Chatterjee<sup>a,c,\*</sup>*

<sup>a</sup>*Department of Material Engineering, Indian Institute of Science, Bangalore, Karnataka 560012, India*

<sup>b</sup>*Terasaki Institute for Biomedical Innovation, Los Angeles, CA 90024, USA*

<sup>c</sup>*Department of Bioengineering, Indian Institute of Science, Bangalore, Karnataka 560012, India*

<sup>d</sup>*Centre for Nanobiotechnology, Vellore Institute of Technology, Vellore, Tamil Nadu 632014, India*

<sup>e</sup>*Department of Bioscience and Biotechnology and Centre of Excellence for the Oceans, National Taiwan Ocean University, Keelung, 202301, Taiwan*

<sup>f</sup>*School of Pharmacy, College of Pharmacy, Kaohsiung Medical University, Kaohsiung, 80708, Taiwan*

*\*Corresponding author (s): [amitnain@iisc.a.cin](mailto:amitnain@iisc.a.cin) (A.N.) & [kchatterjee@iisc.ac.in](mailto:kchatterjee@iisc.ac.in) (K.C.)*

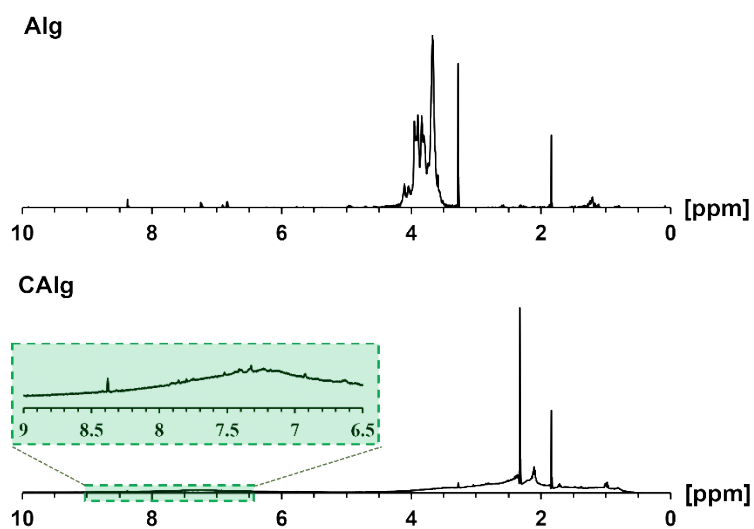

**Fig. S1.** The <sup>1</sup>H-NMR spectra of Alg and CAlg at a concentration of 50 mg mL<sup>-1</sup> in D<sub>2</sub>O at 298 K. Inset in CAlg is the spectra from 6.5–9.0 ppm.

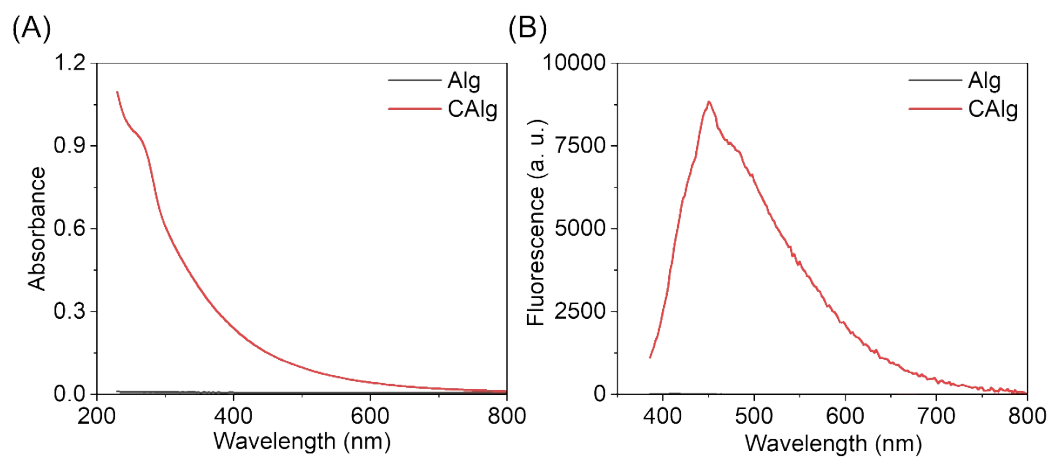

**Fig. S2:** (A) UV-visible absorption and (B) photoluminescence spectra of alginate before (Alg) and after (CAlg) heating.

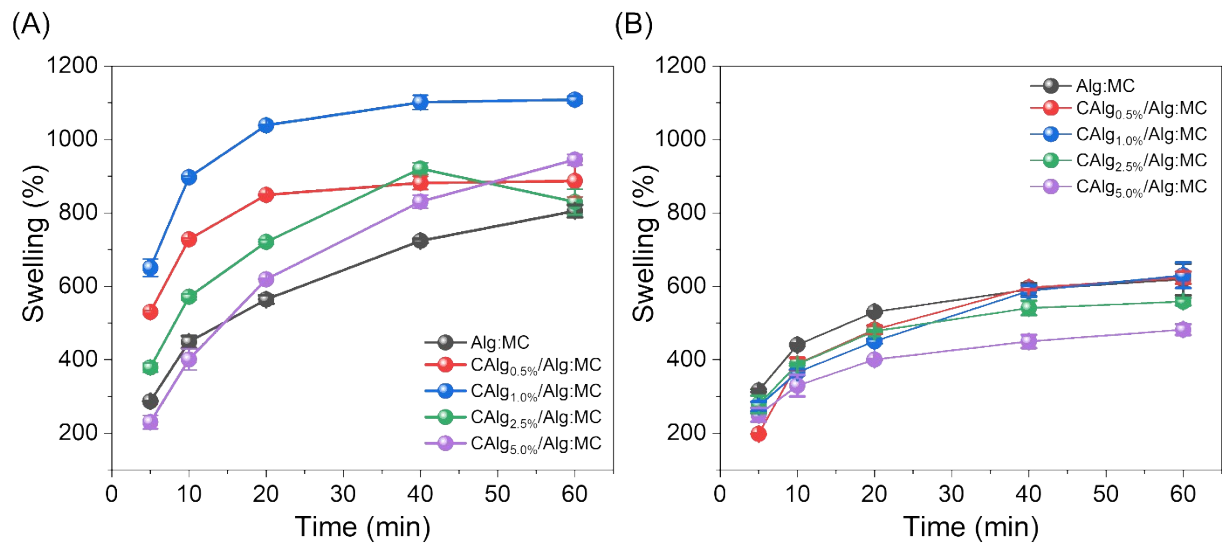

**Fig. S3:** Swelling behavior of CAAlg/Alg:MC hydrogel (CAAlg=0-5wt.%) prepared using (A) 3:9 and (B) 4:6 composition in DI water.

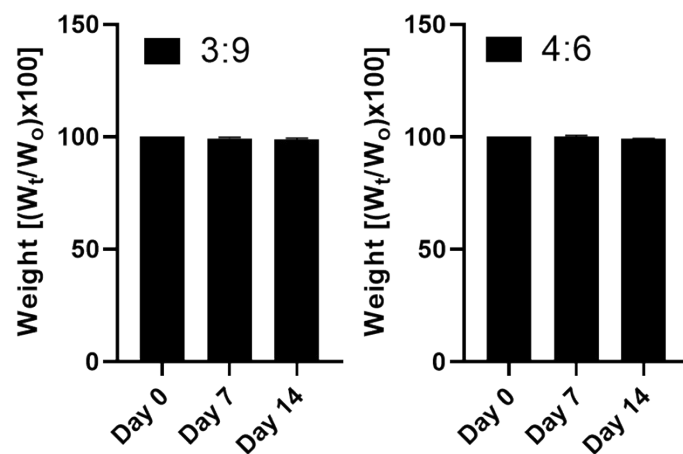

**Fig. S4:** Degradation behavior of CAIlg/Alg:MC hydrogels (CAIlg=2.5wt.%) in phosphate-buffered saline.

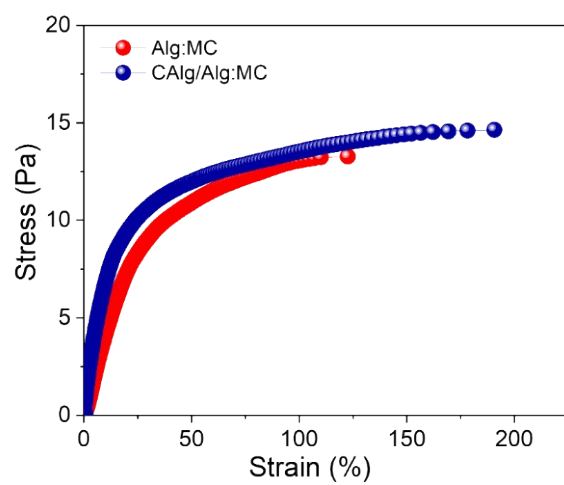

**Fig. S5:** Stress-strain curve of pristine Alg:MC and nanoengineered CAlg/Alg:MC hydrogel under uniaxial tensile force at a force rate of  $0.1 \text{ N mm}^{-1}$ .

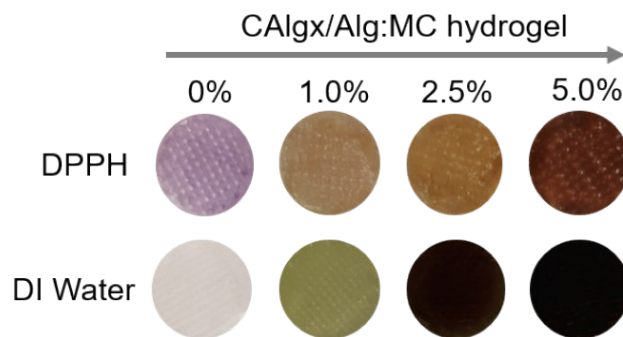

**Fig. S6:** Disc-shaped (diameter 10 mm and thickness 0.25 mm) 3D-printed CAIlg/Alg:MC hydrogel (CAIlg=0-5wt.%) immersed in 2,2-diphenyl-1-picryl-hydrazyl-hydrate (DPPH) solution for 1 h. Other conditions are the same as in Figure 3B.

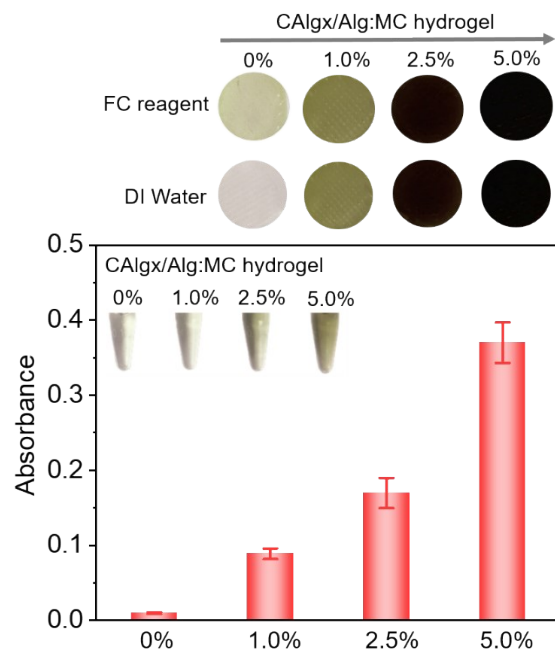

**Fig. S7:** The absorbance of Folin-Ciocalteu (FC) reagent (0.0125 N) at 765 nm incubated with CAIg/Alg:MC (CAIg=0-5wt.%) for 1 h, in the presence of Na<sub>2</sub>CO<sub>3</sub> (0.1 M). Data are presented as mean  $\pm$  SD (n = 3).

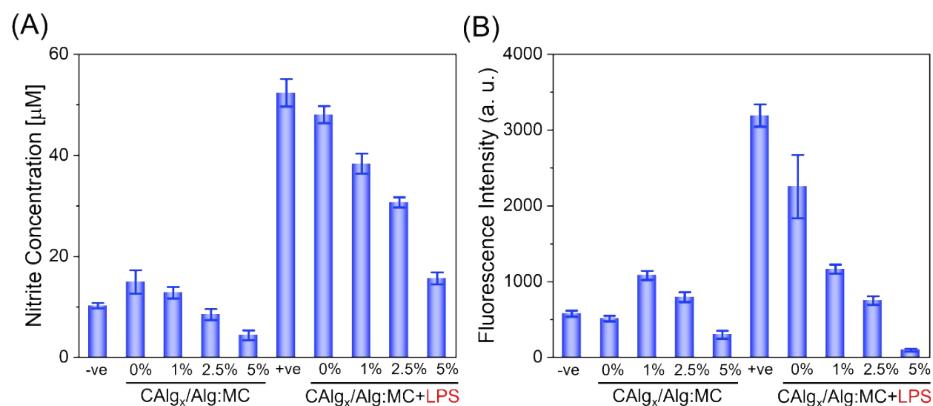

**Fig. S8:** Estimation of (A) nitrite (absorbance at 540 nm) and (B) DCF fluorescence intensity (excitation/emission wavelength; 490/530 nm) in RAW264.7 macrophages incubated in the absence and presence of CAIg/Alg:MC (CAIg=0-5wt.%) in 5% CO<sub>2</sub> at 37 °C for 24 h using Griese reagent and DCFH-DA assay, respectively. Data are presented as mean  $\pm$  SD (n = 3).

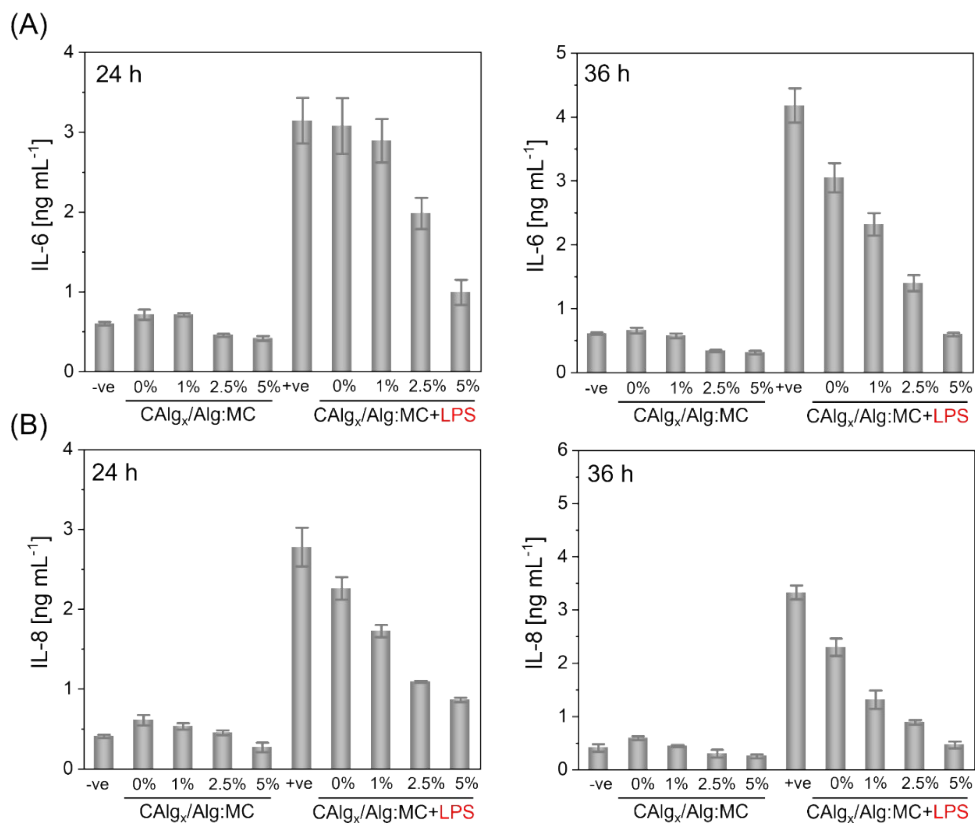

**Fig. S9:** Concentrations of pro-inflammatory cytokines (IL-6 and IL-8) in the RAW264.7 macrophages incubated in the absence and presence of CAI<sub>g</sub>/Alg:MC (CAI<sub>g</sub>=0-5wt.%) in 5% CO<sub>2</sub> at 37 °C for 24 h and 36 h were determined using ELISA. Data are presented as mean ± SD (n = 3).

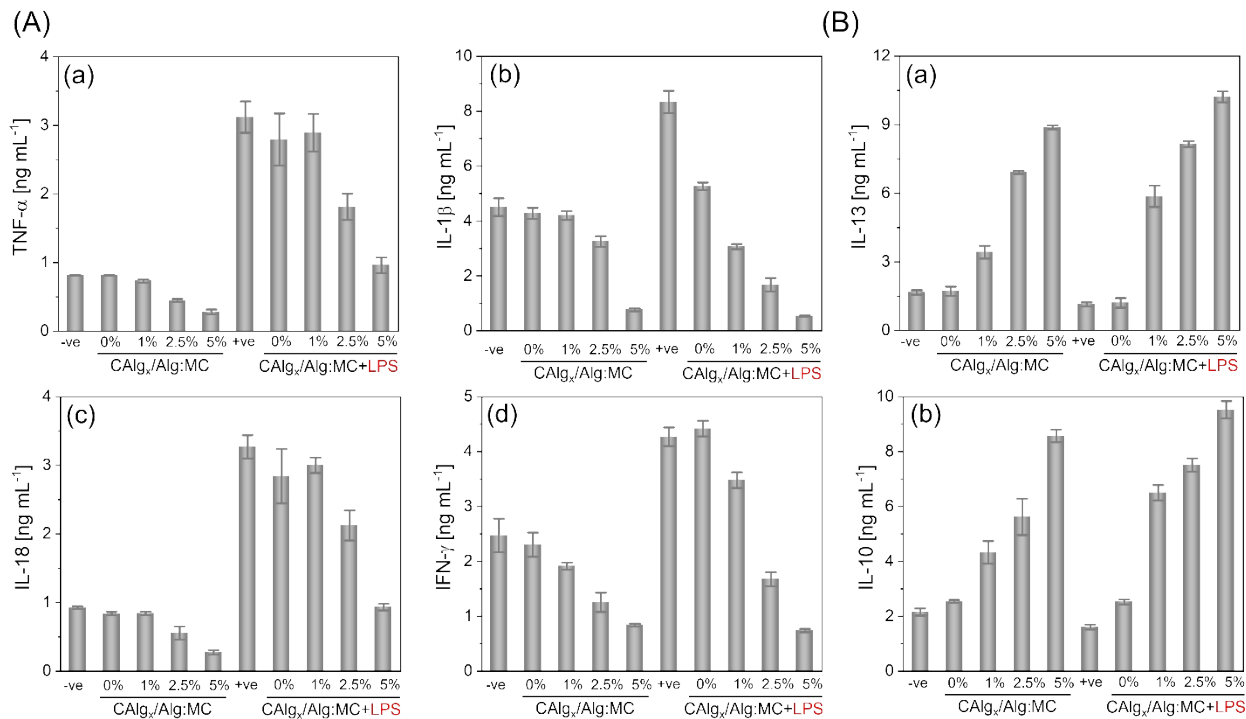

**Fig. S10:** Concentrations of (A) pro-inflammatory cytokines, (A-a) TNF- $\alpha$ , (A-b) IL-1 $\beta$ , (A-c) IL-18, and (A-d) IFN- $\gamma$  and (E) anti-inflammatory cytokines, (B-a) IL-13 and (B-b) IL-10 in the RAW264.7 macrophages incubated in the absence and presence of CAIg/Alg:MC (CAIg=0-5wt.%) in 5% CO<sub>2</sub> at 37 °C for 24 h were determined using ELISA. Data are presented as mean  $\pm$  SD (n = 3).

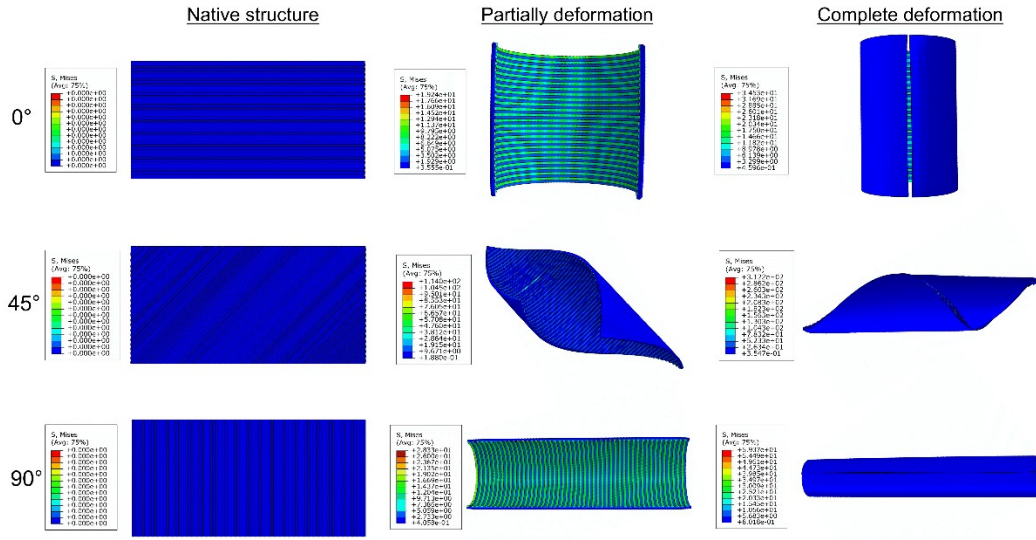

**Fig. S11:** FEA simulations of tubular geometries showing different stripe angles and subsequent effects of stripe angle ( $0^\circ$ ,  $45^\circ$  and  $90^\circ$ ) on corresponding deformations determined computationally.

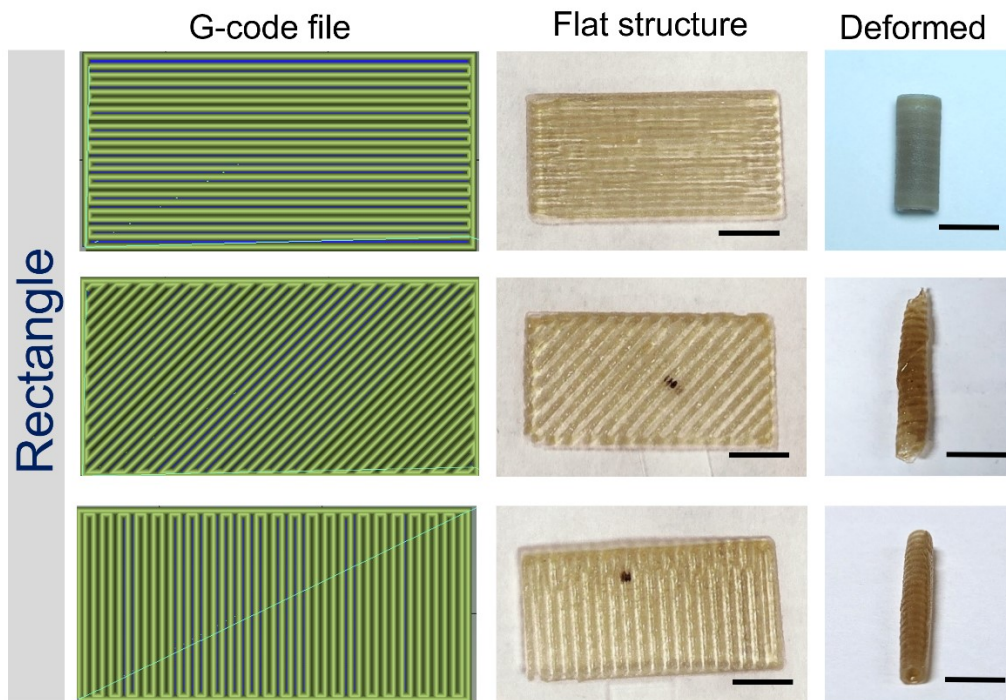

**Fig. S12:** G-codes of different tubular geometries and subsequent experimental validation of the effect of stripe angle ( $0^\circ$ ,  $45^\circ$ , and  $90^\circ$ ) on corresponding deformations. The scale bar is 4 mm.

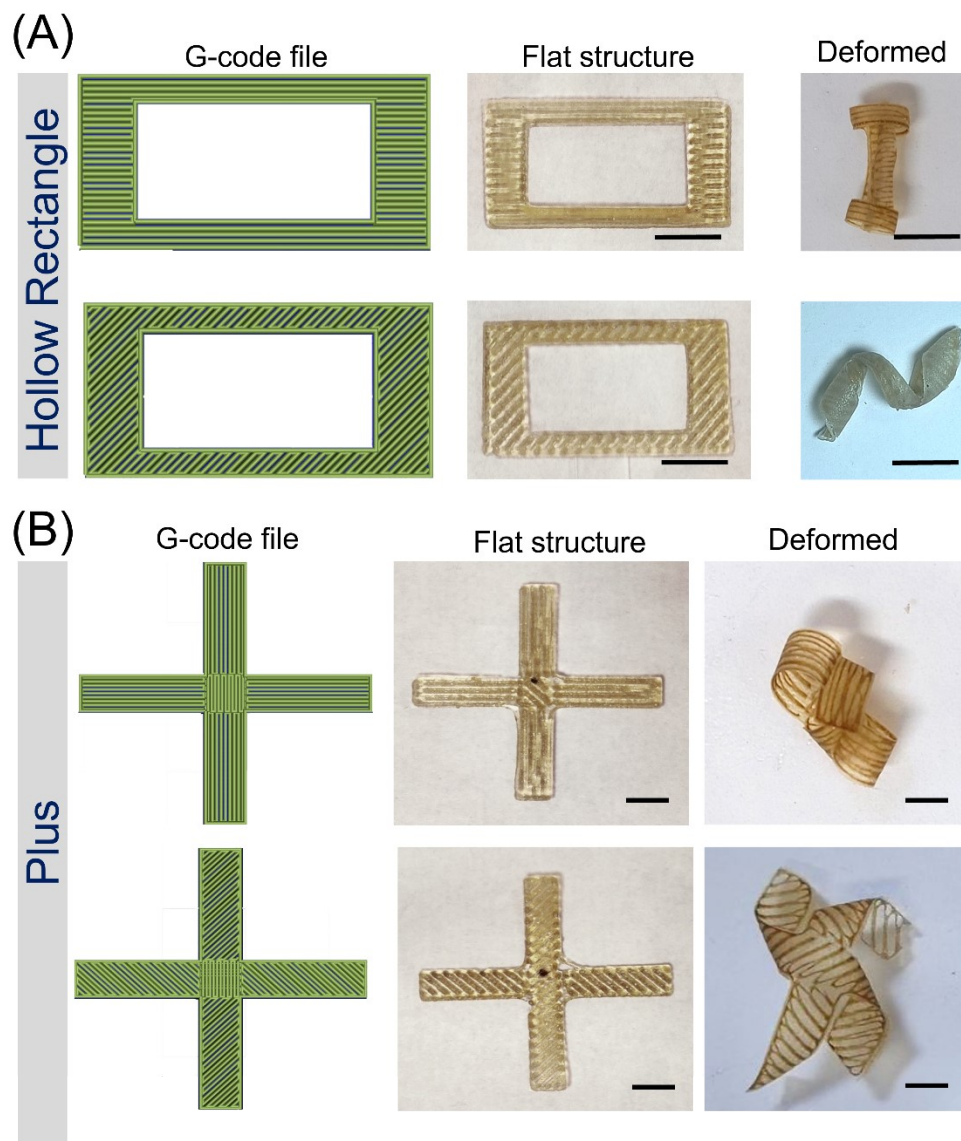

**Fig. S13:** Experimental validation of (A) hollow rectangle and (B) plus-shaped geometries. The G-codes were created based on predictive computational designs and the subsequent effect of stripe angles ( $0^\circ$ ,  $45^\circ$ , and  $90^\circ$ ) on shaped deformation. Scale bars in (A) and (B) are 10 mm and 7.5 mm, respectively.

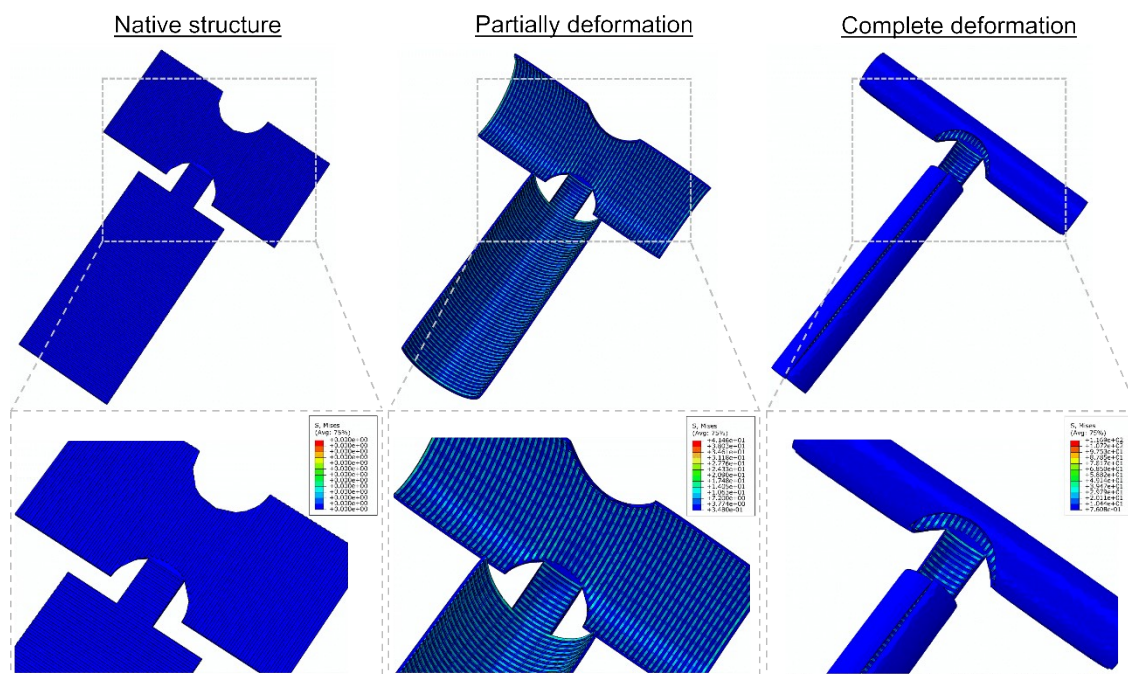

**Fig. S14:** 3D representation of FEA simulations of T-shaped deformations.
